# Supplementary material for: Compensatory induction of MYC expression by sustained CDK9 inhibition via a BRD4-dependent mechanism
Source: eLife journal article supplement (doi:10.7554/elife.06535), 2015-06-17
Supplement: figures [file elife-06535-figures-v2.pdf]

---

## Figures and figure supplements

Compensatory induction of MYC expression by sustained CDK9 inhibition via a BRD4-dependent mechanism

**Huasong Lu, et al.**

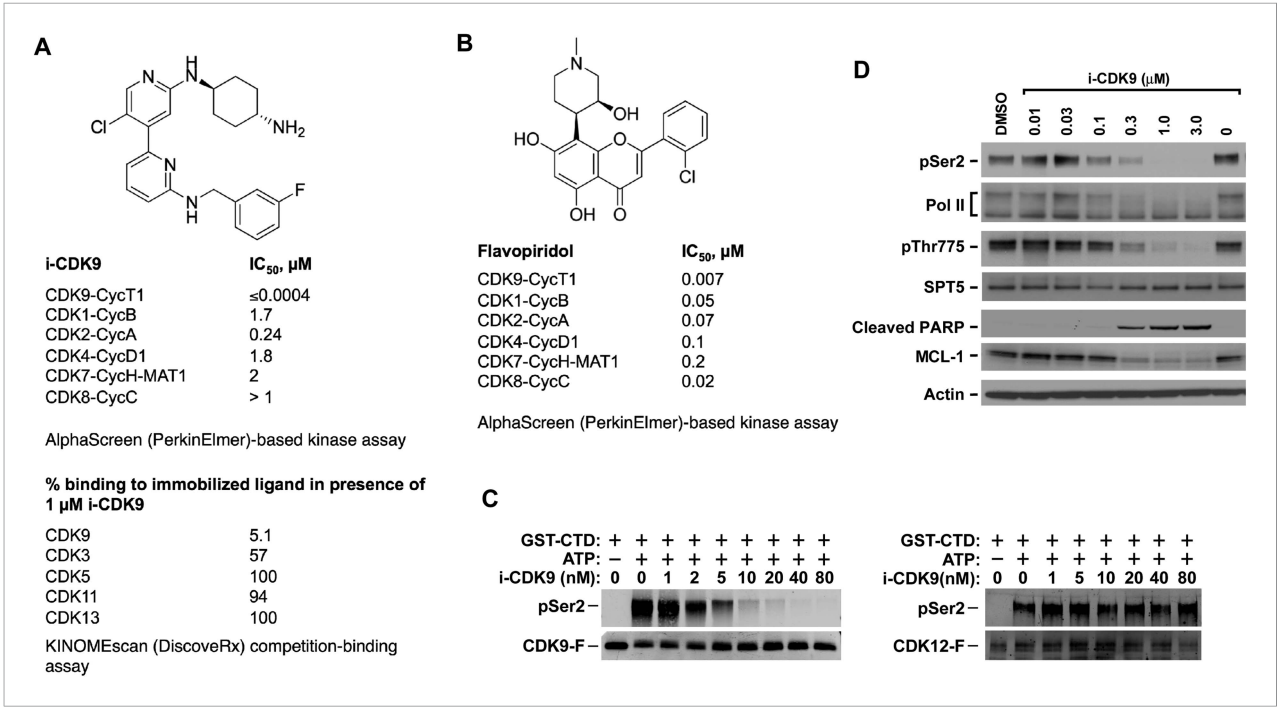

**Figure 1.** i-CDK9 is a potent and selective CDK9 inhibitor that elicits cellular responses indicative of P-TEFb inhibition. **(A and B)** Structures and selectivity profiles of i-CDK9 **(A)** and falvopiridol **(B)**. The numbers refer to the concentrations (μM) of the two compounds that resulted in 50% inhibition of the enzymatic activity of the indicated CDK–cyclin pairs in the AlphaScreen (PerkinElmer)-based kinase assay **(A)** or 50% inhibition of the bindings of the indicated CDKs to the immobilized ligands in the KINOMEScan platform **(B)**. **(C)** In vitro kinase reactions containing affinity-purified CDK9-F-CycT or CDK12-F-CycK and GST-CTD as a substrate were conducted in the presence of the indicated concentrations of i-CDK9. pSer2 and the Flag-tagged kinase in each reaction were detected by Western blotting with anti-pSer2 and anti-Flag antibodies, respectively. **(D)** HeLa cells were treated for 8 hr with DMSO or the indicated concentrations of i-CDK9. Total cell lysates were examined by immunoblotting for the proteins labeled on the left.

DOI: 10.7554/eLife.06535.003

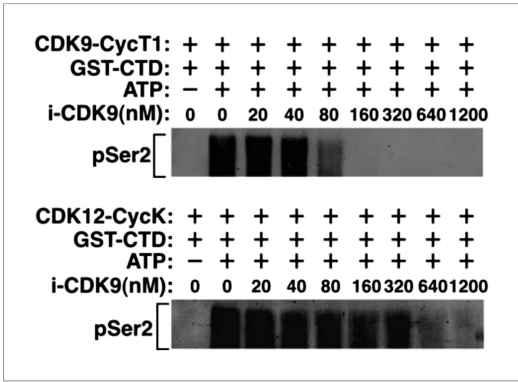

**Figure 1—figure supplement 1.** Recombinant CDK12-CycK is less sensitive to inhibition by i-CDK9.

DOI: 10.7554/eLife.06535.005

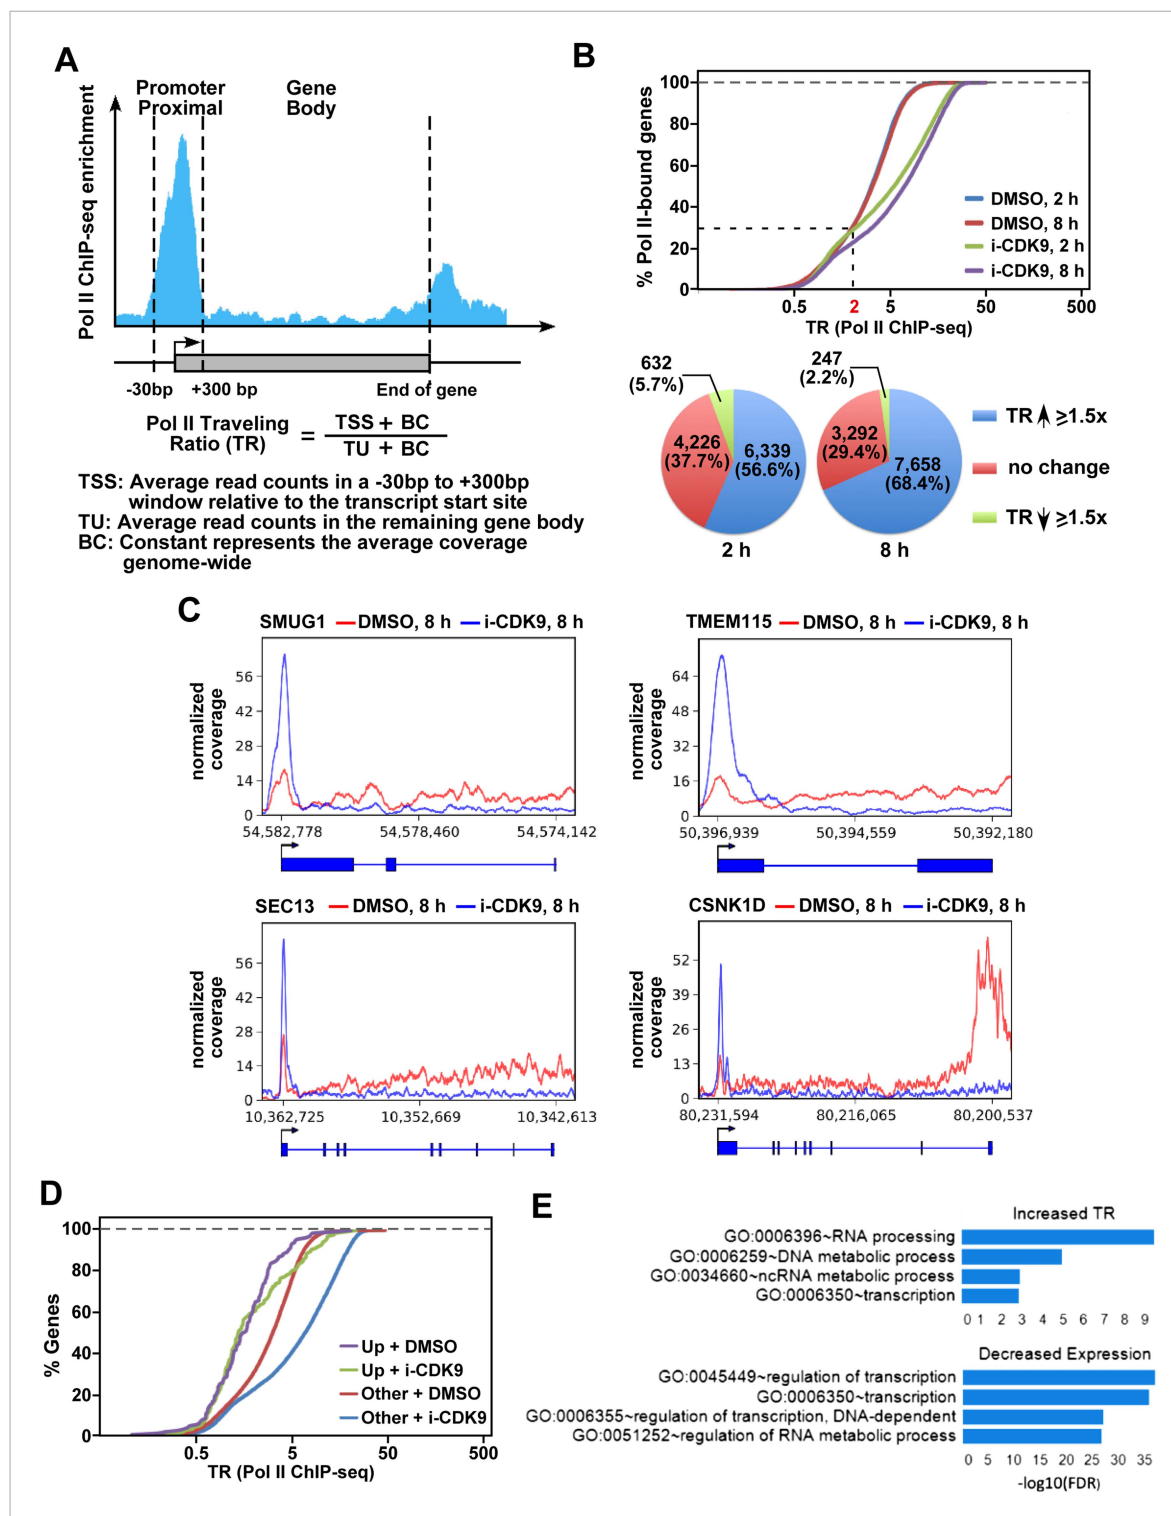

**Figure 2.** i-CDK9 causes widespread promoter-proximal pausing by Pol II and the biggest decrease in expression for genes involved in regulation of transcription and RNA metabolic process. **(A)** Schematic diagram illustrating calculation of the Pol II traveling ratio (TR). **(B)** Distribution of Pol II-bound genes with a given TR as determined by ChIP-seq under the various conditions as indicated. The pie charts below describe the percentages of genes with 1.5-fold increase, 1.5-fold decrease, or no change in TR after exposure to i-CDK9 for 2 or 8 hr as compared to DMSO. **(C)** Occupancy of Pol II as revealed by ChIP-seq across 4 representative genes with increased TR after CDK9 inhibition. The read coverage is shown for the entire gene plus a margin on either side equal to 7% of the gene length. **(D)** Distribution of Pol II-bound genes with a given TR as determined by ChIP-seq. The genes are grouped by expression changes induced by i-CDK9. Up: the 138 genes that showed at least twofold increase in expression after exposure to i-CDK9 or 8 hr. Other: Figure 2. continued on next page

*Figure 2. Continued*

genes whose expression was either unaffected or affected less than twofold by i-CDK9. **(E)** Enrichment of GO biological processes by DAVID. Only top 4 gene sets are shown for top 500 genes with the biggest increase in TR at 8 hr treatment with i-CDK9 (top) and top 500 genes with the largest decrease in gene expression at 8 hr i-CDK9 treatment (bottom).

DOI: [10.7554/eLife.06535.006](https://doi.org/10.7554/eLife.06535.006)

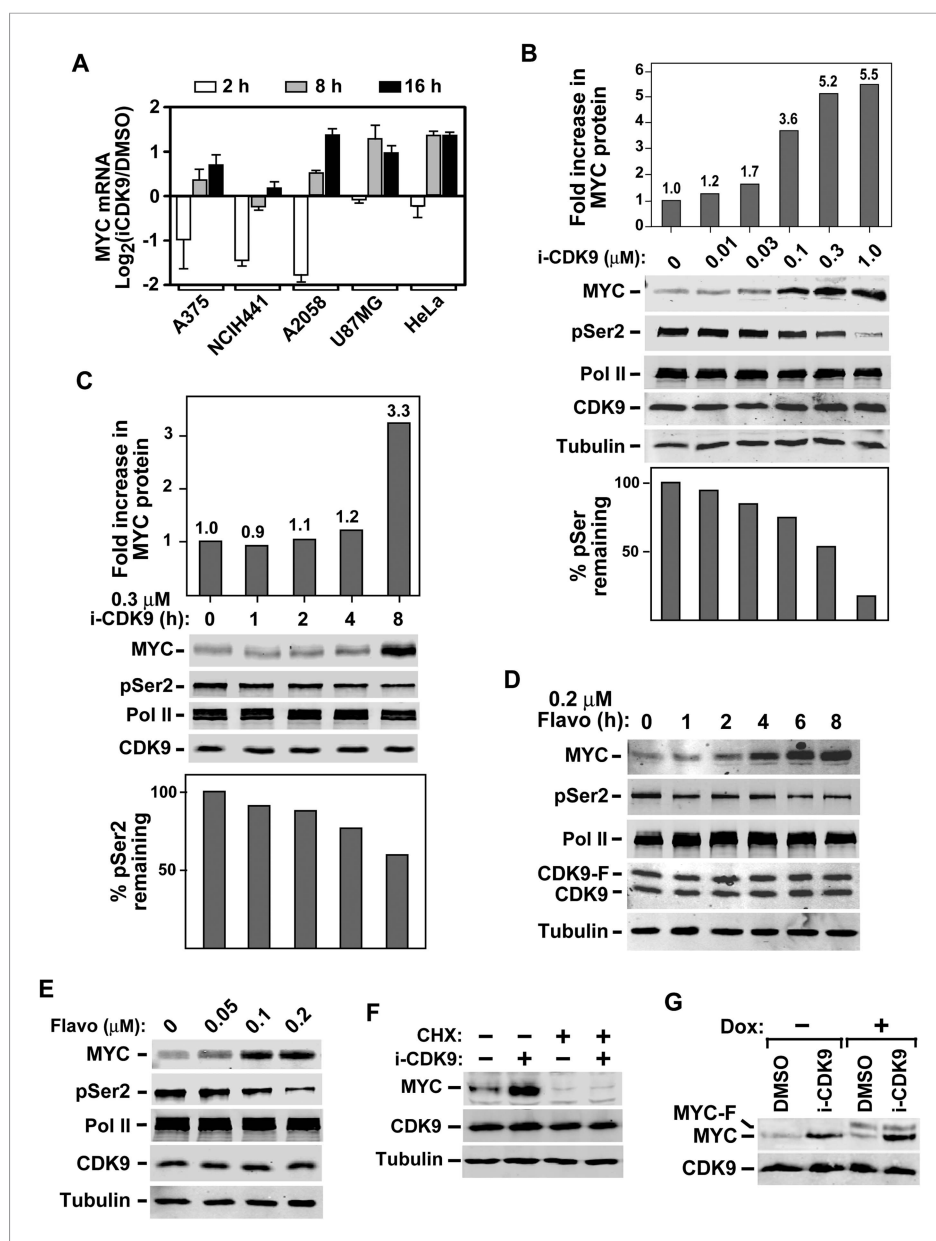

**Figure 3.** Induction of MYC mRNA production in response to sustained inhibition of CDK9 by i-CDK9 and the requirement of MYC's natural genomic structure in this process. **(A)** The indicated tumor cell lines were treated with i-CDK9 (0.5 μM) for 2–16 hr and the MYC mRNA levels, which were divided by those in the DMSO-treated cells and averaged from three independent replicates of DNA microarray analysis, were shown as log2 values. **(B)** HeLa cells were treated with the indicated concentrations of i-CDK9 for 8 hr and the various proteins in the total cell lysates were detected by immunoblotting as indicated. Quantifications of the levels of MYC protein and Ser2-phosphorylated Pol II (pSer2) in the lysates were shown above and below the immunoblots, respectively. **(C)** HeLa cells were treated with 0.3 μM i-CDK9 for the indicated number of hr and cell lysates were obtained and analyzed as in **B**. **(D and E)** HeLa cells were treated with either 0.3 μM flavopiridol for the indicated time periods **(D)** or 8 hr with the indicated concentrations of flavopiridol **(E)** and analyzed by immunoblotting as in **B**. **(F)** Cells were pretreated with (+) or without (–) cycloheximide (CHX) prior to incubation with i-CDK9. The levels of the indicated proteins were examined by immunoblotting. **(G)** A HeLa-based cell line containing the stably transfected, doxycycline (Dox)-inducible MYC-F-expressing plasmid driven by the CMV promoter was pretreated with (+) or without (–) Dox prior to incubation with i-CDK9 or DMSO. MYC and MYC-F expressed from the endogenous MYC locus and the transfected plasmid, respectively, were detected by immunoblotting.

DOI: [10.7554/eLife.06535.007](https://doi.org/10.7554/eLife.06535.007)

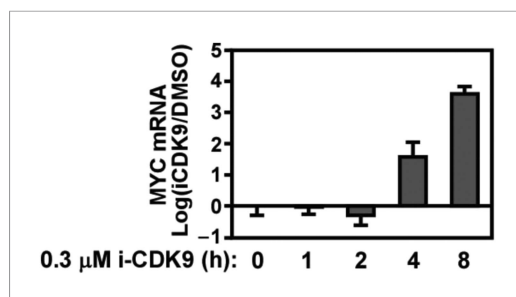

**Figure 3—figure supplement 1.** Biphasic response of MYC mRNA production throughout the course of CDK9 inhibition by i-CDK9.

DOI: [10.7554/eLife.06535.008](https://doi.org/10.7554/eLife.06535.008)

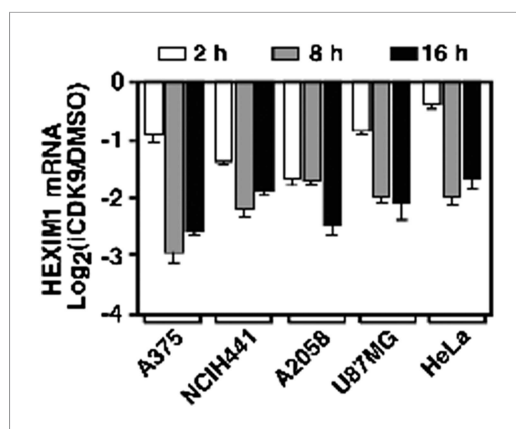

**Figure 3—Figure supplement 2.** HEXIM1 expression is continuously suppressed throughout the entire course of i-CDK9 treatment of five different tumor cell lines.

DOI: [10.7554/eLife.06535.009](https://doi.org/10.7554/eLife.06535.009)

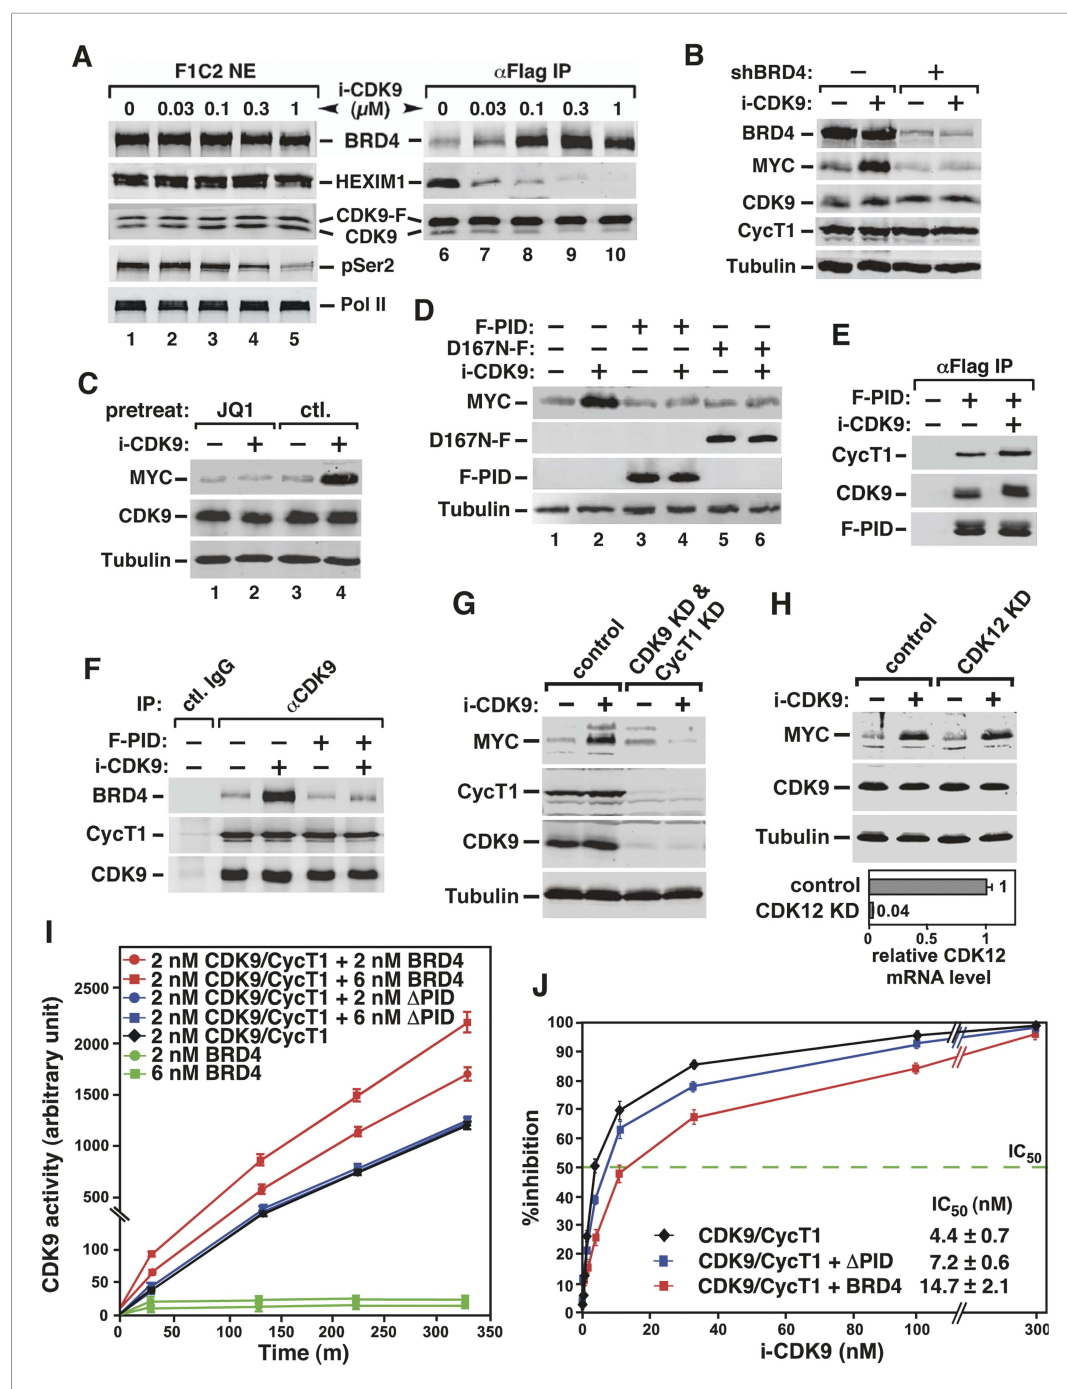

**Figure 4.** Activation of MYC transcription by i-CDK9 depends on induced transfer of kinase-active P-TEFb from 7SK snRNP to BRD4, binding of the BRD4-P-TEFb complex to acetylated MYC chromatin template, and BRD4-mediated increase in CDK9's catalytic activity and resistance to inhibition. **(A)** The HeLa-based F1C2 cells stably expressing CDK9-F were incubated with the indicated concentrations of i-CDK9. Nuclear extracts (NE) and the anti-CDK9-F immunoprecipitates (IP) derived from NE were analyzed by immunoblotting to detect the indicated proteins. **(B)** and **(C)** Lysates of HeLa cells expressing the BRD4-specific shRNA (shBRD4; **B**) or pretreated with JQ1 or the control enantiomer (ctl.; **C**) were incubated with (+) or without (-) i-CDK9 and analyzed by immunoblotting for the indicated proteins. **(D-H)** Cells were first transfected with plasmids expressing F-PID (**D**, **E** and **F**), D167N-F (**D**), or shCycT1 (**G**) or transfected with siRNAs specific for CDK9 (**G**) or CDK12 (**H**) and then treated with i-CDK9 or DMSO (-). NE (**D**, **G** and **H**) and immunoprecipitates (IP) obtained from NE with anti-Flag mAb (**E**) or anti-CDK9 antibodies or rabbit total IgG (**F**) were examined by immunoblotting for the indicated proteins. The relative CDK12 mRNA levels were

Figure 4. continued on next page

Figure 4. Continued

analyzed by qRT-PCR at the bottom in **H**, with the level in cells transfected with a control siRNA set to 1. (**I** and **J**) In vitro kinase reactions containing a synthetic Pol II CTD peptide (CDK7tide) as the substrate and CDK9-CycT1 (Invitrogen) as the kinase were conducted in the presence of the indicated amounts of WT or  $\Delta$ PID BRD4. Phosphorylation of the peptide was measured over the indicated time periods and plotted in **I**, with the error bars representing mean  $\pm$  SD from three independent experiments. The indicated amounts of i-CDK9 were added to the reactions in **J**, and its inhibition of CDK9 phosphorylation of the peptide was measured and plotted with the inhibitory IC<sub>50</sub> shown.

DOI: [10.7554/eLife.06535.010](https://doi.org/10.7554/eLife.06535.010)

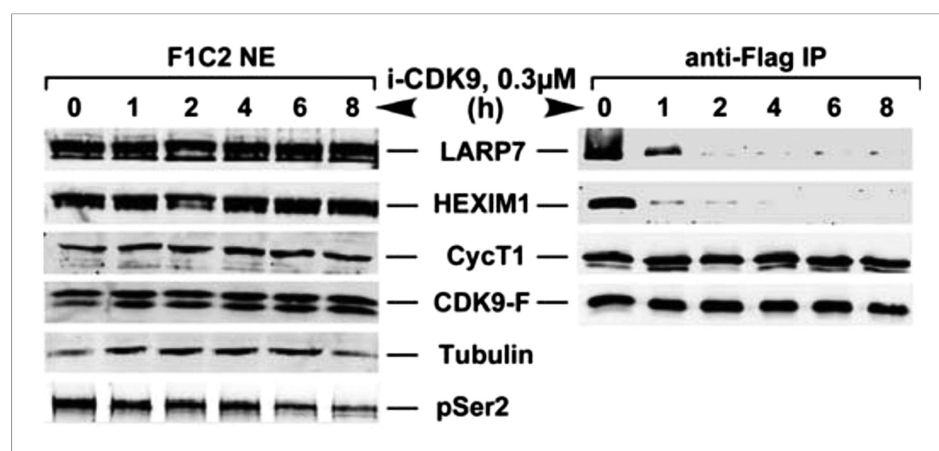

**Figure 4—figure supplement 1.** i-CDK9 (0.3 μM) induces disruption of 7SK snRNP at a time point much earlier than that required to cause about 50% reduction in global pSer2.

DOI: [10.7554/eLife.06535.011](https://doi.org/10.7554/eLife.06535.011)



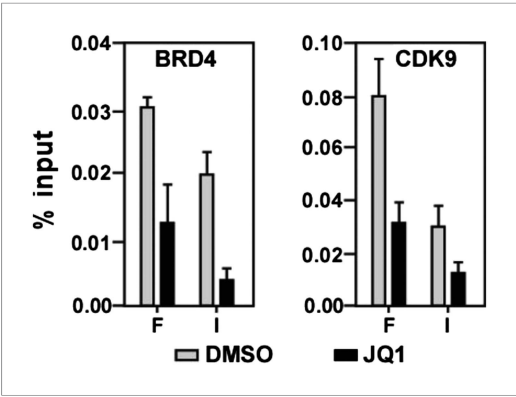

**Figure 4—figure supplement 2.** JQ1 decreases associations of both BRD4 and CDK9 with the MYC locus.  
DOI: 10.7554/eLife.06535.012

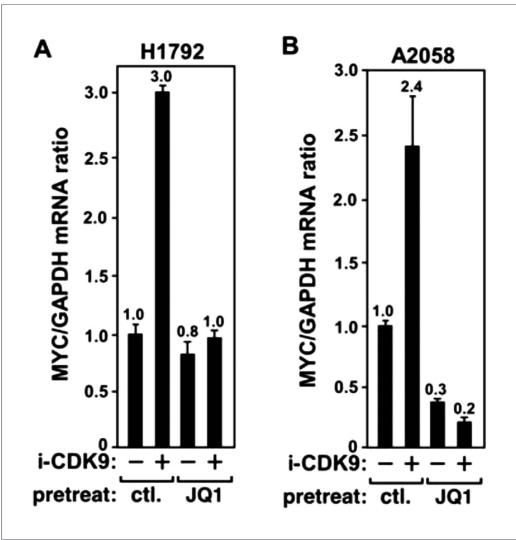

**Figure 4—figure supplement 3.** JQ1 blocks the i-CDK9-induced MYC expression in H1792 and A2058 cells.  
DOI: 10.7554/eLife.06535.013

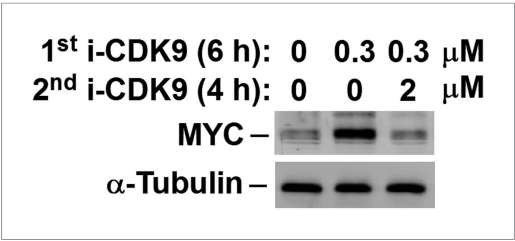

**Figure 4—figure supplement 4.** MYC induction by 0.3 μM i-CDK9 can be subsequently shut off by 2 μM of the drug.  
DOI: 10.7554/eLife.06535.014

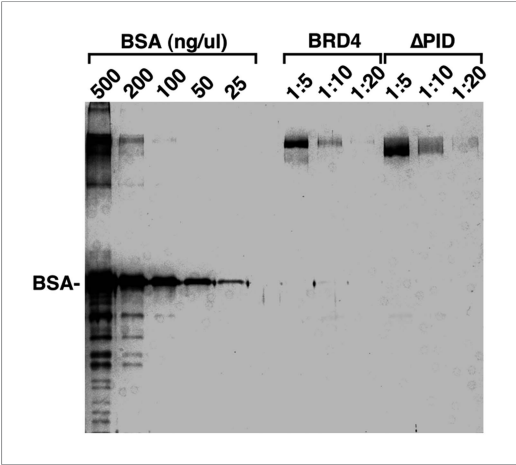

**Figure 4—figure supplement 5.** Examination of the purity and concentrations of WT and ΔPID BRD4 used in the CDK9 kinase assay.  
DOI: 10.7554/eLife.06535.015

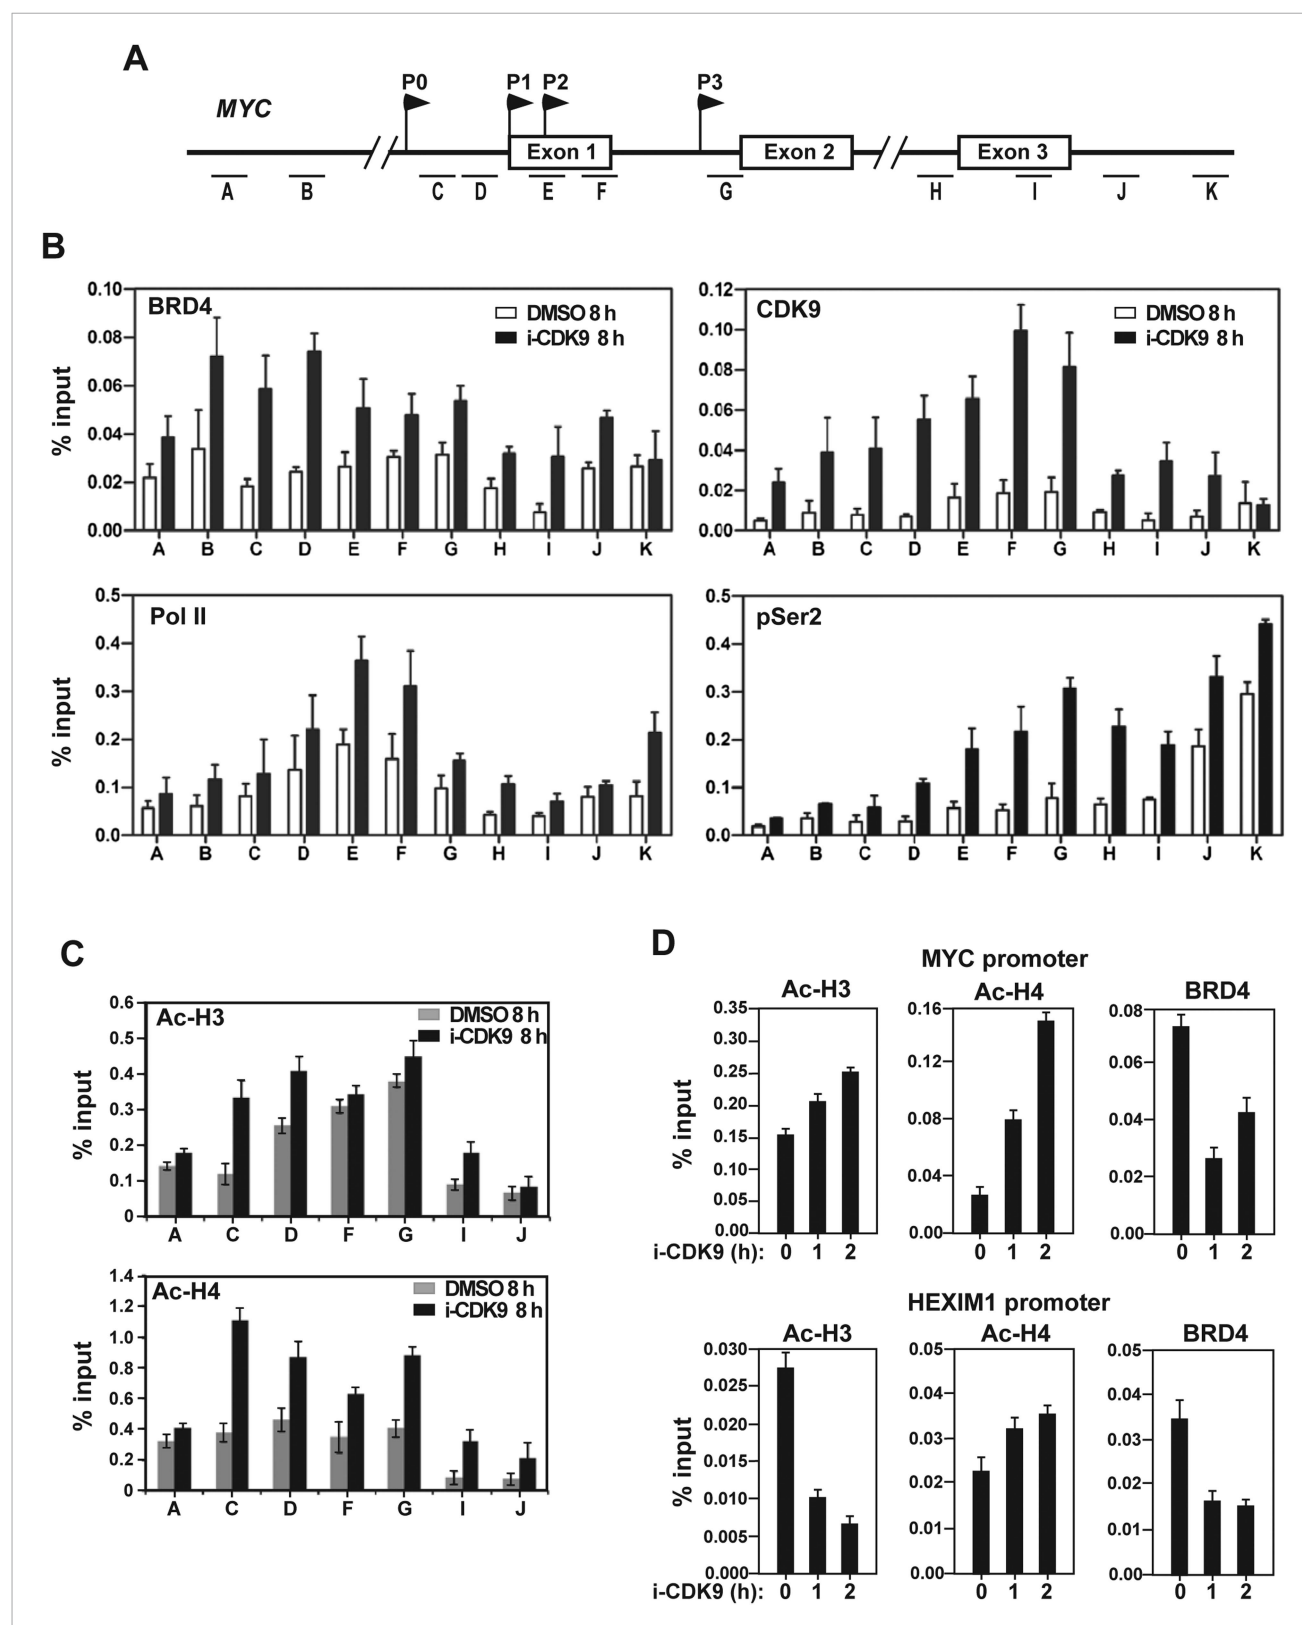

**Figure 5.** Treatment with i-CDK9 (0.3  $\mu$ M for 8 hr) increases the levels of P-TEFb, BRD4, total Pol II, Pol II with pSer2 CTD and acetyl-H3/H4 at the MYC locus. **(A)** Genomic structure of the MYC locus. Arrows indicate the positions and direction of the four MYC promoters P0 to P3. The small horizontal bars labeled with letters A to K mark the positions of 11 amplicons generated by quantitative PCR (qPCR) analysis of the ChIP DNA. **(B and C)** HeLa cells were

*Figure 5. continued on next page*

Figure 5. Continued

treated with either i-CDK9 or DMSO and subjected to ChIP-qPCR analysis to determine the levels of the indicated factors bound to the MYC locus. The signals were normalized to those of input; and the error bars in all panels represent mean  $\pm$  SD from three independent experiments. **(D)** HeLa cells were treated with 0.3  $\mu$ M i-CDK9 for the indicated time periods and subjected to ChIP-qPCR analysis to determine the levels of the indicated factors bound to the MYC locus at position C and the HEXIM1 locus at position L (see **Figure 5—figure supplement 2**). The signals were normalized to those of input; and the error bars represent mean  $\pm$  SD from three independent experiments.

DOI: [10.7554/eLife.06535.016](https://doi.org/10.7554/eLife.06535.016)

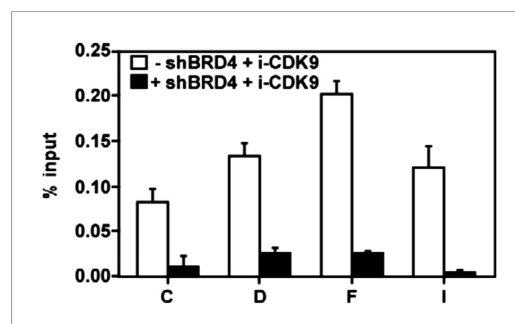

**Figure 5—figure supplement 1.** The i-CDK9-induced increase in CDK9's binding to the MYC locus is mostly BRD4-dependent.

DOI: [10.7554/eLife.06535.017](https://doi.org/10.7554/eLife.06535.017)

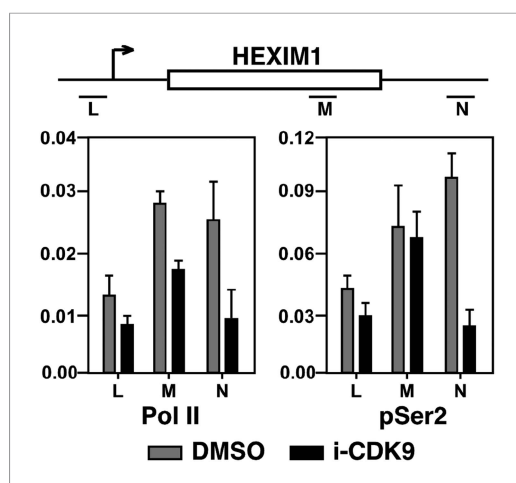

**Figure 5—figure supplement 2.** Treatment with i-CDK9 (0.3  $\mu$ M for 8 hr) decreases the levels of both total Pol II and Pol II with pSer2 CTD at the HEXIM1 locus.  
DOI: [10.7554/eLife.06535.018](https://doi.org/10.7554/eLife.06535.018)

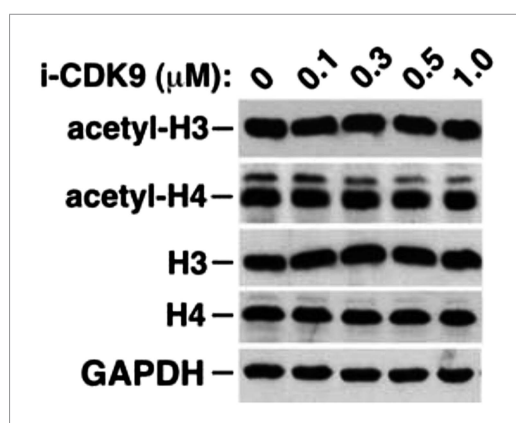

**Figure 5—figure supplement 3.** i-CDK9 does not affect the cellular levels of acetylated histones H3 and H4.  
DOI: [10.7554/eLife.06535.019](https://doi.org/10.7554/eLife.06535.019)

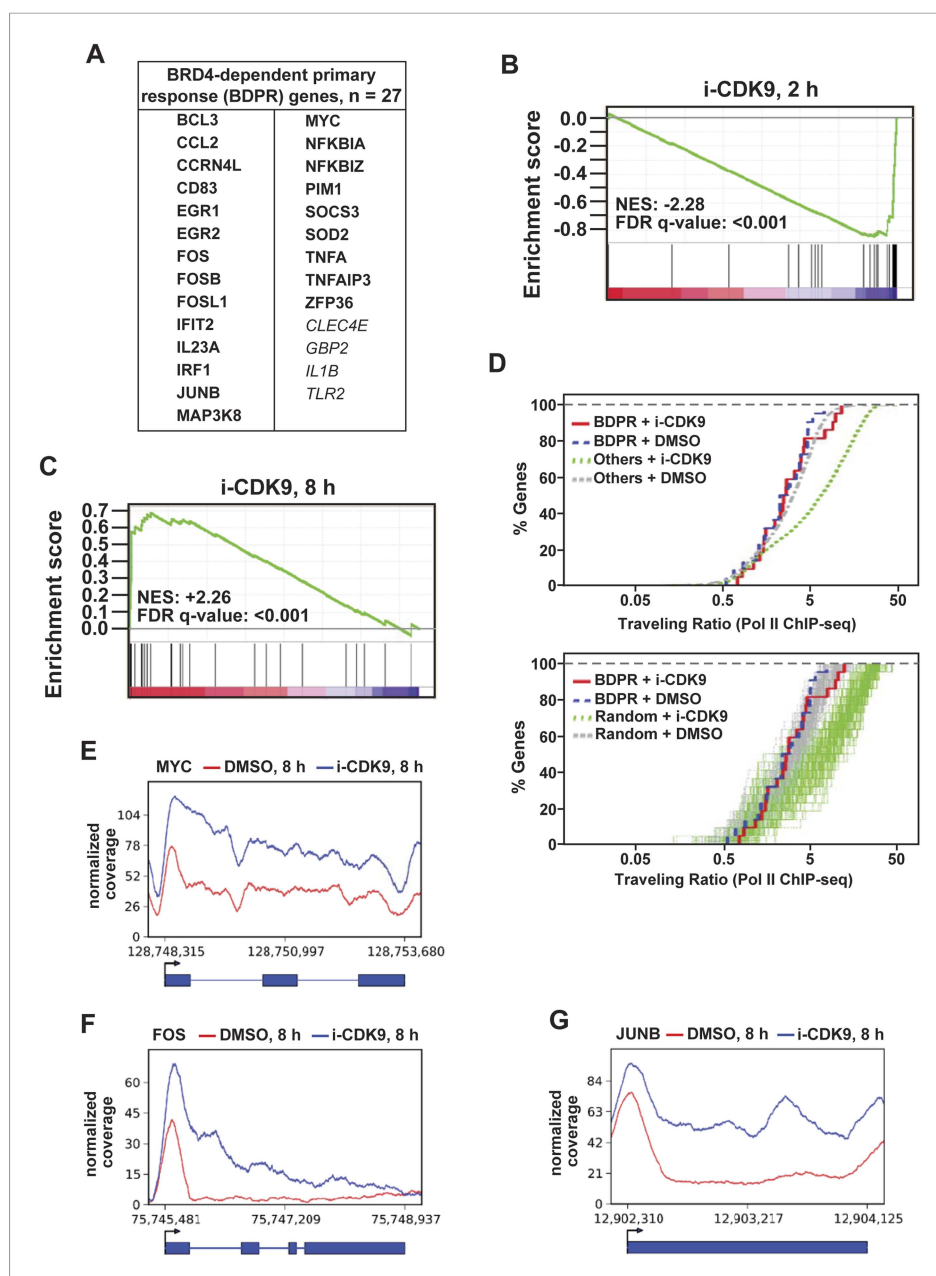

**Figure 6.** i-CDK9 affects the expression of other BRD4-dependent primary response genes similarly as it does to MYC. **(A)** The list of 27 curated BRD4-dependent primary response (BDPR) genes identified in bone marrow-derived macrophages is displayed in alphabetical order. The 23 genes in bold face type had detectable Pol II signals in HeLa cells as revealed by ChIP-seq analysis. **(B and C)** GSEA results for the 27 BDPR genes at 2 hr **(B)** and 8 hr **(C)** post CDK9 inhibition. NES: Normalized Enrichment Score; FDR: False Discovery Rate. **(D)** Distribution of Pol II-bound genes with a given TR as determined by ChIP-seq. The genes are grouped by the indicated gene types and treatment conditions. The top panel compares the 23 BDPR genes to the remaining Pol II-bound genes in the genome, and the bottom compares the BDPR genes to 23 randomly selected genes. **(E, F, G)** Occupancy of Pol II across three representative BDPR genes as revealed by ChIP-seq. The read coverage is shown for the entire gene plus a margin on either side equal to 7% of the gene length.

DOI: [10.7554/eLife.06535.020](https://doi.org/10.7554/eLife.06535.020)

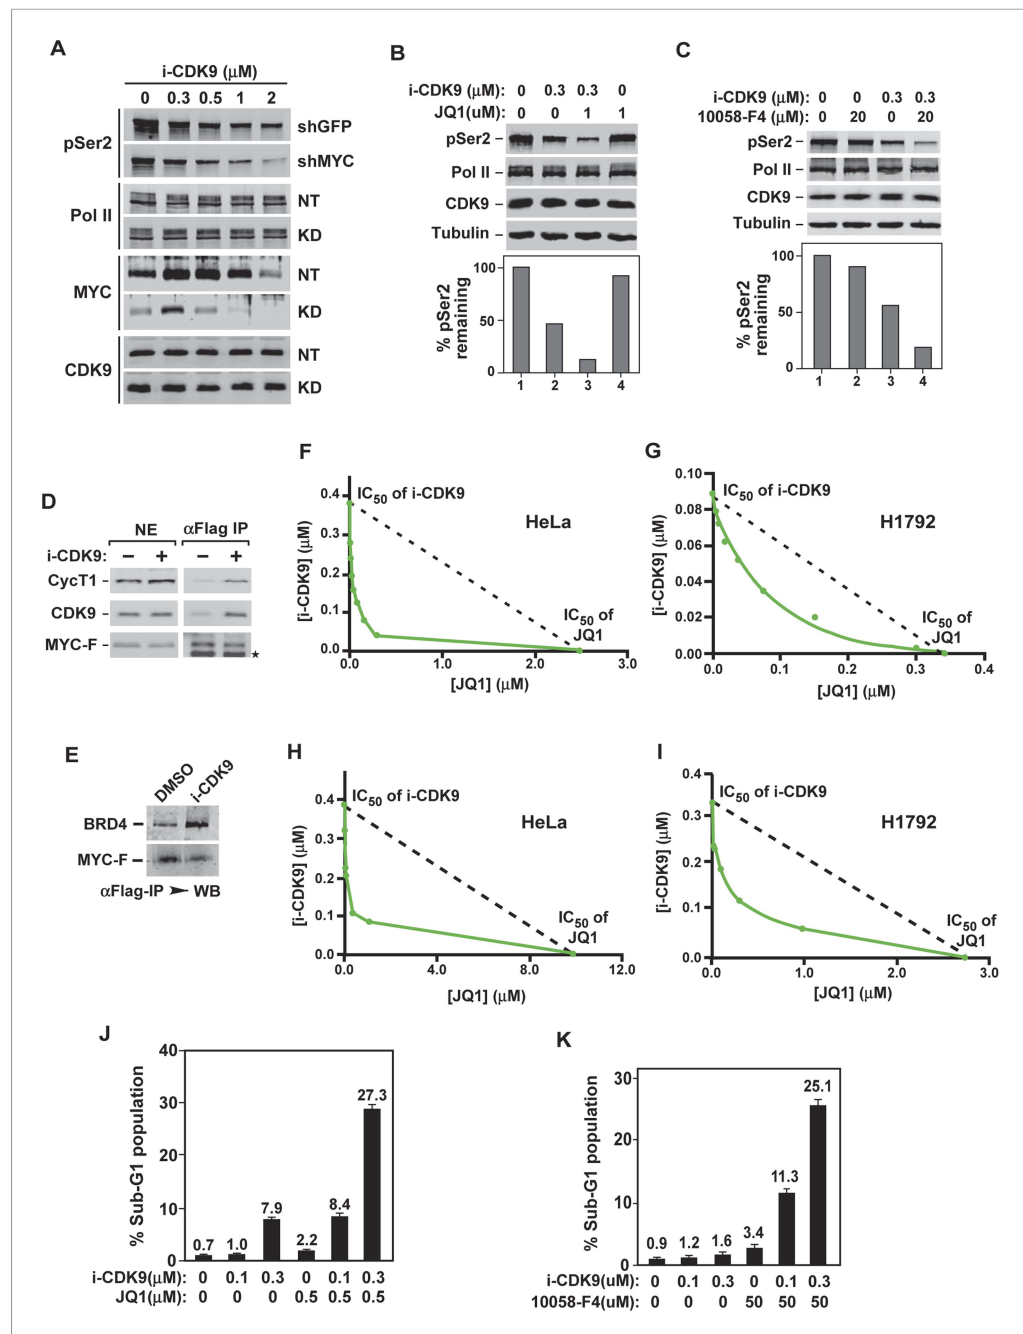

**Figure 7.** Simultaneous inhibition of CDK9 and MYC synergistically induces growth arrest and apoptosis of cancer cells due to the fact that MYC facilitates P-TEFb phosphorylation of Pol II CTD and increases binding to BRD4-P-TEFb upon CDK9 inhibition. **(A)** Lysates of HeLa cells expressing the indicated shRNA and exposed to increasing concentrations of i-CDK9 were analyzed by immunoblotting for the indicated proteins. **(B and C)** Lysates of HeLa cells treated with the indicated drugs and their concentrations were analyzed by immunoblotting, with quantification of the pSer2 signals shown at the bottom. **(D and E)** Nuclear extracts (NE) of HeLa-based cells expressing MYC-F and untreated (–) or treated with i-CDK9 or DMSO were subjected to anti-Flag immunoprecipitation. The immunoprecipitates (IP) were examined by immunoblotting for the indicated proteins. **(F, G, H, and I)** HeLa **(F and H)** and H1792 **(G and I)** cells were incubated with JQ1 or i-CDK9 alone or together at various concentrations. The concentrations of each drug (IC<sub>50</sub>), either used as a single agent or in combination, that caused 50% of cells to show growth inhibition in Celltiter-Glo assay **(F and G)** or produce Caspase 3/7 **(H and I)** were plotted using the isobologram method. The dotted lines denote the IC<sub>50</sub> values of i-CDK9 and JQ1 had the effects of the two compounds been simply additive. **(J and K)** HeLa cells were treated with the indicated concentrations of i-CDK9 plus JQ1 **(J)** or 10058-F4 **(K)**. Figure 7. continued on next page

*Figure 7. Continued*

JQ1 (**J**) or i-CDK9 plus 10,058-F4 (**K**) and measured by flow cytometry for propidium iodide (PI)-stained sub-G1 population. The error bars represent mean  $\pm$  SD from three independent measurements.

DOI: [10.7554/eLife.06535.021](https://doi.org/10.7554/eLife.06535.021)
