# Supplementary material for: Compensatory induction of MYC expression by sustained CDK9 inhibition via a BRD4-dependent mechanism
Source: eLife journal article supplement (doi:10.7554/elife.06535), 2015-06-17
Supplement: supp [file elife-06535-supp-v1.zip]

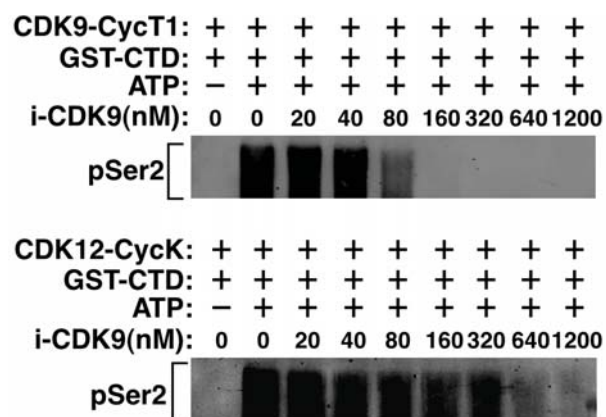

**Figure 1-figure supplement 1.**

**CDK12-CycK is less sensitive to inhibition by i-CDK9.** In vitro kinase reactions containing recombinant, baculovirus-produced CDK9-CycT1 and CDK12-CycK (SignalChem), purified GST-CTD as the substrate, and ATP were conducted in the presence of increasing concentrations of i-CDK9 as indicated. The pSer2 levels on the Pol II CTD were detected by Western blotting.
