# Supplementary material for: Compensatory induction of MYC expression by sustained CDK9 inhibition via a BRD4-dependent mechanism
Source: eLife journal article supplement (doi:10.7554/elife.06535), 2015-06-17
Supplement: supp [file elife-06535-supp-v1.zip]

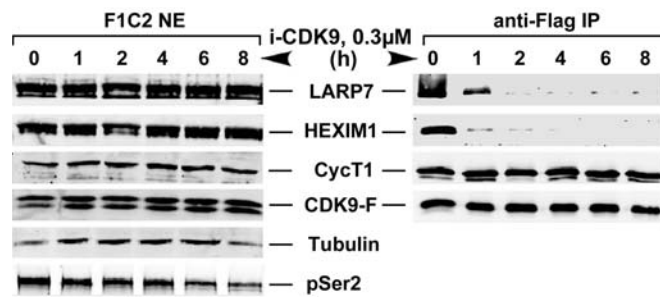

**Figure 4-figure supplement 1.**

**i-CDK9 (0.3  $\mu$ M) induces disruption of 7SK snRNP at a time point much earlier than that required to cause about 50% reduction in global pSer2.** The HeLa-based F1C2 cells stably expressing CDK9-F were incubated with 0.3  $\mu$ M i-CDK9 for the indicated number of hours. Nuclear extracts (NE) and anti-Flag immunoprecipitates (IP) derived from NE were analyzed by immunoblotting to detect the indicated proteins.
