# Supplementary material for: Compensatory induction of MYC expression by sustained CDK9 inhibition via a BRD4-dependent mechanism
Source: eLife journal article supplement (doi:10.7554/elife.06535), 2015-06-17
Supplement: supp [file elife-06535-supp-v1.zip]

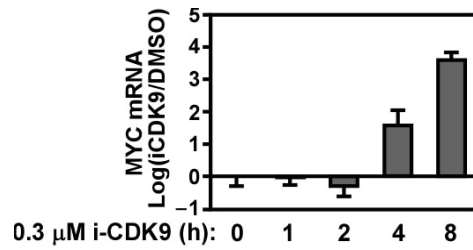

**Figure 3-figure supplement 1.**

**Biphasic response of MYC mRNA production throughout the course of CDK9 inhibition by i-CDK9.** Total RNA were extracted from HeLa cells treated with 0.3  $\mu$ M i-CDK9 or DMSO for the indicated number of hours. The MYC mRNA levels as determined by qRT-PCR in the i-CDK9-treated cells were divided by those in the DMSO-treated cells and shown as log10 values. The error bars represent mean  $\pm$  SD from three independent experiments.
