# Supplementary material for: Compensatory induction of MYC expression by sustained CDK9 inhibition via a BRD4-dependent mechanism
Source: eLife journal article supplement (doi:10.7554/elife.06535), 2015-06-17
Supplement: supp [file elife-06535-supp-v1.zip]

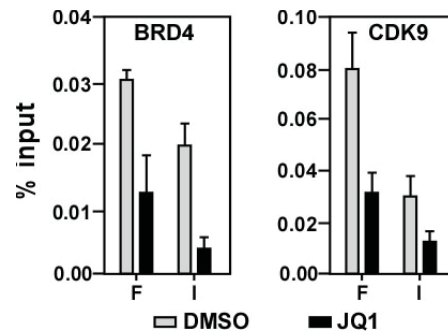

**Figure 4-figure supplement 2.**

**JQ1 decreases associations of both BRD4 and CDK9 with the *MYC* locus.** HeLa cells were treated with either i-CDK9 or DMSO for 8 hr and subjected to ChIP-qPCR analysis to determine the levels of BRD4 and CDK9 bound to the F and I locations at the *MYC* locus (see main Fig. 5A for the precise locations of F and I). The signals were normalized to those of input; and the error bars represent mean  $\pm$  SD from three independent experiments.
