# Supplementary material for: Compensatory induction of MYC expression by sustained CDK9 inhibition via a BRD4-dependent mechanism
Source: eLife journal article supplement (doi:10.7554/elife.06535), 2015-06-17
Supplement: supp [file elife-06535-supp-v1.zip]

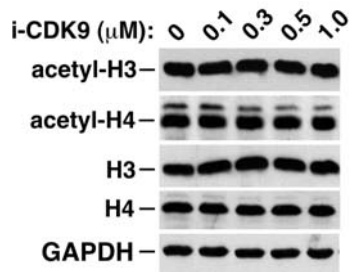

**Figure 5-figure supplement 3.**

**i-CDK9 does not affect the cellular levels of acetylated histones H3 and H4.** HeLa cells were treated with the indicated concentrations of i-CDK9 for 8 hr and whole cell lysates were analyzed by SDS-PAGE followed by Western blotting to monitor the levels of the indicated proteins.
