# Supplementary material for: Compensatory induction of MYC expression by sustained CDK9 inhibition via a BRD4-dependent mechanism
Source: eLife journal article supplement (doi:10.7554/elife.06535), 2015-06-17
Supplement: supp [file elife-06535-supp-v1.zip]

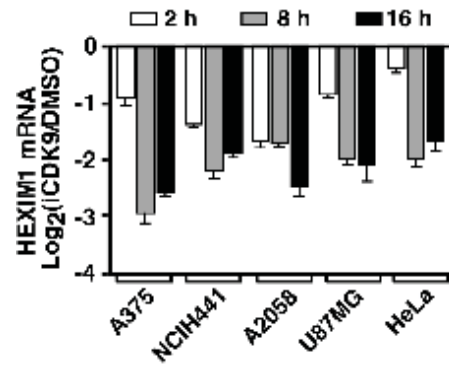

**Figure 3-figure supplement 2.**

**HEXIM1 expression is continuously suppressed throughout the entire course of i-CDK9 treatment of five different tumor cell lines.** The indicated tumor cell lines were treated with i-CDK9 for 2, 8, and 16 hr and the HEXIM1 mRNA levels as determined by microarray in the treated cells were divided by those in the DMSO-treated cells and shown as log10 values
