# Supplementary material for: Compensatory induction of MYC expression by sustained CDK9 inhibition via a BRD4-dependent mechanism
Source: eLife journal article supplement (doi:10.7554/elife.06535), 2015-06-17
Supplement: supp [file elife-06535-supp-v1.zip]

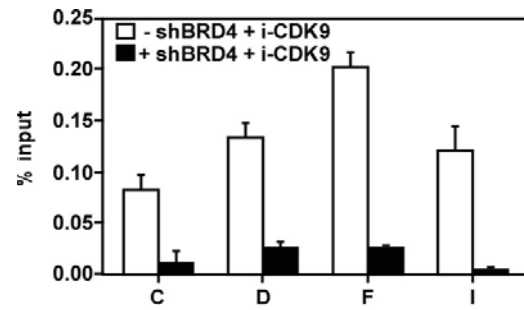

**Figure 5-figure supplement 1.**

**The i-CDK9-induced increase in CDK9's binding to the MYC locus is mostly BRD4-dependent.** HeLa cells expressing shBRD4 (+) or not (-) were treated with i-CDK9 and subjected to ChIP-qPCR analysis to determine the levels of CDK9 bound to four different locations (C, D, F and I) at the MYC locus (see main Fig. 5A for these 4 locations). The signals were normalized to those of input; and the error bars represent mean  $\pm$  SD from three independent experiments.
