# Supplementary material for: Compensatory induction of MYC expression by sustained CDK9 inhibition via a BRD4-dependent mechanism
Source: eLife journal article supplement (doi:10.7554/elife.06535), 2015-06-17
Supplement: supp [file elife-06535-supp-v1.zip]

Archive with 12 entries (12 files):
- elife_poa_e06535_Figure_5_figure_supplement_3.pdf
- elife_poa_e06535_Figure_1_figure_supplement_1.pdf
- elife_poa_e06535_Figure_3_figure_supplement_2.pdf
- elife_poa_e06535_Figure_4_figure_supplement_2.pdf
- elife_poa_e06535_Figure_5_figure_supplement_1.pdf
- elife_poa_e06535_Figure_5_figure_supplement_2.pdf
- elife_poa_e06535_Figure_4_figure_supplement_1.pdf
- elife_poa_e06535_Figure_4_figure_supplement_3.pdf
- elife_poa_e06535_Figure_4_figure_supplement_4.docx
- elife_poa_e06535_Figure_1_source_data_1.xlsx
- elife_poa_e06535_Figure_3_figure_supplement_1.pdf
- elife_poa_e06535_Figure_4_figure_supplement_5.docx
