# Supplementary material for: Compensatory induction of MYC expression by sustained CDK9 inhibition via a BRD4-dependent mechanism
Source: eLife journal article supplement (doi:10.7554/elife.06535), 2015-06-17
Supplement: supp [file elife-06535-supp-v1.zip]

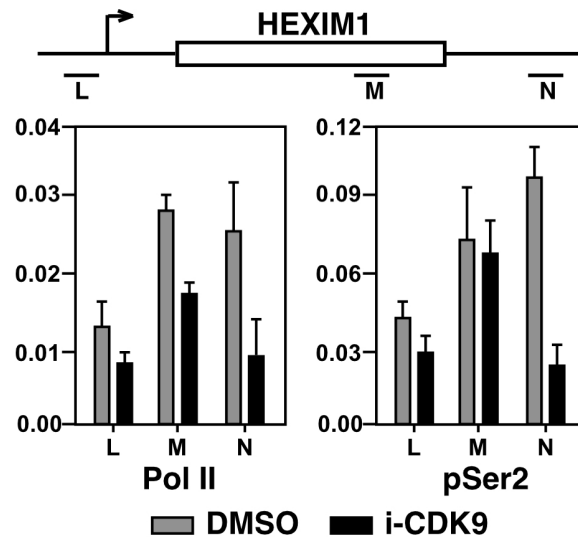

**Figure 5-figure supplement 2.**

**Treatment with i-CDK9 (0.3  $\mu$ M for 8 hr) decreases the levels of both total Pol II and Pol II with pSer2 CTD at the HEXIM1 locus.** Top: Genomic structure of the HEXIM1 locus, with the arrow indicating the transcription start site and the small horizontal bars marking the positions of 3 amplicons generated by qPCR of the ChIP DNA. Bottom: HeLa cells were treated with either i-CDK9 or DMSO and subjected to ChIP-qPCR analysis to determine the levels of the indicated factors bound to the HEXIM1 locus. The signals were normalized to those of input.
