# Supplementary material for: Compensatory induction of MYC expression by sustained CDK9 inhibition via a BRD4-dependent mechanism
Source: eLife journal article supplement (doi:10.7554/elife.06535), 2015-06-17
Supplement: supp [file elife-06535-supp-v1.zip › elife_poa_e06535_Figure_1_source_data_1.xlsx]

## Sheet: Sheet1
Fig.1-source data 1. Selectivity profile of i-CDK9
Description: The DiscoveRx KINOMEscan platform was used to determine the percentages of retention of the more than 400 kinases (column A) on immobilized ligands in the presence of either 10 (column B) or 1 µM (column C) i-CDK9. The 9 kinases that consistently showed less than 40% retention were highlighted yellow. The selectivity profile of i-CDK9 toward these kinases and a select group of others…
Kinase names	% Retention on Solid Support with 10 µM i-CDK (DiscoveRx binding assay)	% Retention on Solid Support with 1 µM i-CDK9 (DiscoveRx binding assay)	IC50 (µM) ( biochemical binding or enzymatic activity)
AAK1	100	100
ABL1(E255K)-nonphosphorylated	100
ABL1(E255K)-phosphorylated		74
ABL1(F317I)-nonphosphorylated	75	99
ABL1(F317I)-phosphorylated		100
ABL1(F317L)-nonphosphorylated	91	100
ABL1(F317L)-phosphorylated		100
ABL1(H396P)-nonphosphorylated	97	45
ABL1(H396P)-phosphorylated		92
ABL1(M351T)-nonphosphorylated	100
ABL1(M351T)-phosphorylated		96
ABL1(Q252H)-nonphosphorylated	91	55
ABL1(Q252H)-phosphorylated		100
ABL1(T315I)-nonphosphorylated	83	100
ABL1(T315I)-phosphorylated		100
ABL1(Y253F)-non phosphorylated	100	84
ABL1(Y253F)-phosphorylated
ABL1-nonphosphorylated	100	81
ABL1-phosphorylated		67
ABL2	100	100
ACVR1	100	100
ACVR1B	100	69
ACVR2A	91	98
ACVR2B	85	100
ACVRL1	100	95
ADCK3	86	100
ADCK4	48	99
AKT1	100	100	>10 (Novartis)
AKT2	77	89
AKT3	87	72
ALK	70	86	>10 (Novartis)
AMPK-alpha1	93	84
AMPK-alpha2	88	83
ANKK1	100	100
ARK5	100	72
ASK1	100	100
ASK2	92	100
AURKA	97	92	>10 (Novartis)
AURKB	91	72
AURKC	71	100
AXL	80	89	>10 (Novartis)
BIKE	63	100
BLK	100	100
BMPR1A	100	63
BMPR1B	89	100
BMPR2	100	100
BMX	81	96
BRAF	70	100
BRAF(V600E)	88	100
BRK	100	70
BRSK1	89	100
BRSK2	88	93
BTK	100	100	>10 (Novartis)
CAMK1	100	96
CAMK1D	100	100
CAMK1G	100	92
CAMK2A	81	91
CAMK2B	81	100
CAMK2D	100	100	4 (Novartis)
CAMK2G	100	100
CAMK4	100	78
CAMKK1	100	100
CAMKK2	100	73
CASK		100
CDC2L1	36	92
CDC2L2	33	100
CDC2L5		100
CDK11	100	94
CDK2	19	85
CDK3	16	57
CDK4-cyclinD1		100
CDK4-cyclinD3		100
CDK5	81	100
CDK7	11	14
CDK8	100	44
CDK9	0	5.1	<0.0004
CDKL1		100
CDKL2	14	80
CDKL3	23	44
CDKL5	3.8	52
CHEK1	82	100
CHEK2	100	98
CIT	8.2	60
CLK1	0.55	14	0.525 (Invitrogen)
CLK2	26	61
CLK3	25	88
CLK4	4.2	18
CSF1R	100	59
CSK	100	100	>10 (Novartis)
CSNK1A1		69
CSNK1A1L	100	97
CSNK1D	33	47
CSNK1E	45	100
CSNK1G1	93	81
CSNK1G2	66	100
CSNK1G3	63	91	>10 (Novartis)
CSNK2A1	100	100
CSNK2A2	78	100
CTK	100	75
DAPK1	100	64
DAPK2	80	90
DAPK3	70	90
DCAMKL1	100	100
DCAMKL2	65	100
DCAMKL3	63	100
DDR1	92	100
DDR2	92	100
DLK	71	100
DMPK	20	100
DMPK2	100	100
DRAK1	48	90
DRAK2	72	82
DYRK1A	0	1.3	0.055 (Invitrogen)
DYRK1B	0.7	0.95	0.047 (Invitrogen)
DYRK2	33	7.1	1.07 (Millipore)
EGFR	100	4.7	>10 (Novartis)
EGFR(E746-A750del)	78	0
EGFR(G719C)	46	86
EGFR(G719S)	100	100
EGFR(L747-E749del, A750P)	85	46
EGFR(L747-S752del, P753S)	65	46
EGFR(L747-T751del,Sins)	61	82
EGFR(L858R)	100	35
EGFR(L858R,T790M)	89	100
EGFR(L861Q)	74	78
EGFR(S752-I759del)	53	77
EGFR(T790M)		100
EIF2AK1		85
EPHA1	100	99
EPHA2	100	100
EPHA3	100	85
EPHA4	89	100	>10 (Novartis)
EPHA5	100	96
EPHA6	91	100
EPHA7	96	100
EPHA8	100	100
EPHB1	100	100
EPHB2	66	100
EPHB3	95	100
EPHB4	100	100	>10 (Novartis)
EPHB6	74	47
ERBB2	100	88
ERBB3	100	100
ERBB4	100	100
ERK1	93	100	>10 (Novartis)
ERK2	100	100	>10 (Novartis)
ERK3	94	94
ERK4	100	100
ERK5	92	100
ERK8	20	85
ERN1	62	100
FAK	99	88	>10 (Novartis)
FER	100	56
FES	90	97
FGFR1	100	100	>10 (Novartis)
FGFR2	100	97	>10 (Novartis)
FGFR3	95	100	>10 (Novartis)
FGFR3(G697C)	100	96
FGFR4	100	98
FGR	98	100
FLT1	81	100
FLT3	100	78	>10 (Novartis)
FLT3(D835H)	70	100
FLT3(D835Y)	68	100
FLT3(ITD)	72	100
FLT3(K663Q)	74	100
FLT3(N841I)	72	48
FLT3(R834Q)		36
FLT4	72	68
FRK	100	72
FYN	100	69	>10 (Novartis)
GAK	89	100
GCN2(Kin.Dom.2,S808G)	100	100
GRK1	100	95
GRK4	100	100
GRK7	84	100
GSK3A	8.7	93
GSK3B	74	79	1.6 (Novartis)
HCK	100	81
HIPK1	29	44
HIPK2	37	100
HIPK3	89	100
HIPK4	3.2	40
HPK1	100	86
HUNK	52	86
ICK	3	85
IGF1R	100	94	>10 (Novartis)
IKK-alpha	71	85
IKK-beta	87	100
IKK-epsilon	100	95
INSR	81	100
INSRR	97	92
IRAK1	73	100
IRAK3	88	100
IRAK4		93	>10 (Novartis)
ITK	86	100
JAK1(JH1domain-catalytic)	100	100	>10 (Novartis)
JAK1(JH2domain-pseudokinase)	81	85	>10 (Novartis)
JAK2(JH1domain-catalytic)	84	76	>10 (Novartis)
JAK3(JH1domain-catalytic)	100	100
JNK1	34	80
JNK2	78	98
JNK3	34	94
KIT	100	91	>10 (Novartis)
KIT(A829P)		100
KIT(D816H)		100
KIT(D816V)	100	100
KIT(L576P)	100	91
KIT(V559D)	90	88
KIT(V559D,T670I)	100	95
KIT(V559D,V654A)	75	100
LATS1	100	100
LATS2	100	100
LCK	100	100	>10 (Novartis)
LIMK1	100	90
LIMK2	100	100
LKB1	96	93
LOK	100	89
LRRK2		100
LRRK2(G2019S)		100
LTK	100	92
LYN	81	100	>10 (Novartis)
LZK	100	100
MAK	30	100
MAP3K1	100	93
MAP3K15	100	100
MAP3K2	100	23
MAP3K3	93	100
MAP3K4	96	87
MAP4K2	10	64
MAP4K3	70	85
MAP4K4	19	65
MAP4K5	85	94
MAPKAPK2	100	100	>10 (Novartis)
MAPKAPK5	94	100	>10 (Novartis)
MARK1	100	99
MARK2	86	76
MARK3	71	94
MARK4	100	100
MAST1	82	100
MEK1	100	100
MEK2	100	96
MEK3	85	99
MEK4	97	39
MEK5		100
MEK6	100	96
MELK	95	100
MERTK	60	100
MET	96	94	>10 (Novartis)
MET(M1250T)	100	86
MET(Y1235D)	11	100
MINK	65	100
MKK7		100
MKNK1	100	100	>10 (Novartis)
MKNK2	99	100	>10 (Novartis)
MLCK	90	100
MLK1	100	100
MLK2	100	100
MLK3	100	85
MRCKA	100	100
MRCKB	100	95
MST1	100	100
MST1R	100	100
MST2	100	72
MST3	90	83
MST4	100	100
MTOR		100
MUSK	100	88
MYLK	100	100
MYLK2	88	100
MYLK4	73	94
MYO3A	96	91
MYO3B	36	100
NDR1	88	100
NDR2	100	95
NEK1	100	70
NEK11		100
NEK2	100	77
NEK3		100
NEK4		100
NEK5	100	88
NEK6	100	70
NEK7	100	100
NEK9	100	100
NIM1	100	100
NLK	91	100
OSR1	85	97
p38-alpha	100	85
p38-beta	100	66
p38-delta	98	100
p38-gamma	100	100
PAK1	100	100
PAK2	91	98	>10 (Novartis)
PAK3	98	100
PAK4	100	100
PAK6	100	100
PAK7	81	75
PCTK1	0.85	19	>0.14 (Ambit)
PCTK2	0.05	14	>0.079 (Ambit)
PCTK3	0.15	33	>0.45 (Ambit)
PDGFRA	88	59	>10 (Novartis)
PDGFRB	100	74
PDPK1	90	100	>10 (Novartis)
PFCDPK1(P.falciparum)		100
PFPK5(P.falciparum)		100
PFTAIRE2	13	72
PFTK1	5.4	76
PHKG1	100	100
PHKG2	72	100
PIK3C2B	95	100
PIK3C2G	99	100
PIK3CA	100	100
PIK3CA(C420R)	100	100
PIK3CA(E542K)	100	100
PIK3CA(E545A)	100	100
PIK3CA(E545K)	95	100
PIK3CA(H1047L)	100	99
PIK3CA(H1047Y)	100	100
PIK3CA(I800L)		100
PIK3CA(M1043I)	75	100
PIK3CA(Q546K)	100	73
PIK3CB	84	68
PIK3CD	100	100
PIK3CG	100	100
PIK4CB	84	29
PIM1	23	100
PIM2	22	96	>10 (Novartis)
PIM3	23	100
PIP5K1A	99	83
PIP5K1C		85
PIP5K2B	77	100
PIP5K2C		100
PKAC-alpha	100	86
PKAC-beta	80	80
PKMYT1	93	100
PKN1	100	73	>10 (Novartis)
PKN2	93	52	>10 (Novartis)
PKNB(M.tuberculosis)		100
PLK1	92	100	>10 (Novartis)
PLK2	100	100
PLK3	89	96
PLK4	91	89
PRKCD	70	98
PRKCE	100	100
PRKCH	80	83
PRKCI		100
PRKCQ	88	100
PRKD1	20	55
PRKD2	47	88
PRKD3	14	73
PRKG1	88	81
PRKG2	100	100
PRKR	100	84
PRKX	90	100
PRP4	100	14
PYK2	100	100
QSK	92	7.4
RAF1	100	100
RET	100	100	>10 (Novartis)
RET(M918T)	73	81
RET(V804L)	79	100
RET(V804M)	74	74
RIOK1	57	100
RIOK2	32	100
RIOK3	73	86
RIPK1	100	100
RIPK2	77	65
RIPK4	100	53
RIPK5		100
ROCK1	93	100
ROCK2	90	100	>10 (Novartis)
ROS1	100	98
RPS6KA4(Kin.Dom.1-N-terminal)	84	48
RPS6KA4(Kin.Dom.2-C-terminal)	74	100
RPS6KA5(Kin.Dom.1-N-terminal)	100	79
RPS6KA5(Kin.Dom.2-C-terminal)	100	100
RSK1(Kin.Dom.1-N-terminal)	82	100
RSK1(Kin.Dom.2-C-terminal)	84	93
RSK2(Kin.Dom.1-N-terminal)	76	86
RSK3(Kin.Dom.1-N-terminal)	78	100
RSK3(Kin.Dom.2-C-terminal)	100	73
RSK4(Kin.Dom.1-N-terminal)	100	70
RSK4(Kin.Dom.2-C-terminal)	51	53
S6K1		100	>10 (Novartis)
SBK1	100	100
SgK110	100	72
SGK3
SIK	100	100
SIK2	64	90
SLK	100	100
SNARK	87	100
SNRK		64
SRC	100	87	>10 (Novartis)
SRMS	80	99
SRPK1	70	100
SRPK2	100	57
SRPK3	100	100
STK16	100	95
STK33	100	88
STK35	91	100
STK36	68	92
STK39	77	100
SYK	100	86	>10 (Novartis)
TAK1	82	100
TAOK1	4	51
TAOK2	5.8	82
TAOK3	1.2	12	1.08 (Millipore)
TBK1	100	100
TEC	100	99
TESK1	57	100
TGFBR1	100	95
TGFBR2	100	87
TIE1	100	85
TIE2	100	82
TLK1	95	62
TLK2	100	100
TNIK	36	72
TNK1	65	100
TNK2	99	88
TNNI3K	100	81
TRKA	89	100
TRKB	100	100
TRKC	95	63
TRPM6		92
TSSK1B	68	99
TTK	100	100
TXK	100	100
TYK2(JH1domain-catalytic)	100	62	>10 (Novartis)
TYK2(JH2domain-pseudokinase)	86	100
TYRO3	100	71
ULK1	79	80
ULK2	100	100
ULK3	88	94
VEGFR2	93	83
VRK2		100
WEE1	100	100
WEE2	100	100
YANK1		100
YANK2	100	90
YANK3	50	89
YES	90	84	>10 (Novartis)
YSK1	96	98
YSK4	68	100
ZAK	93	100
ZAP70	96	1.6	>10
