# Supplementary material for: Compensatory induction of MYC expression by sustained CDK9 inhibition via a BRD4-dependent mechanism
Source: eLife journal article supplement (doi:10.7554/elife.06535), 2015-06-17
Supplement: supp [file elife-06535-supp-v1.zip › elife_poa_e06535_Figure_4_figure_supplement_3.pdf]

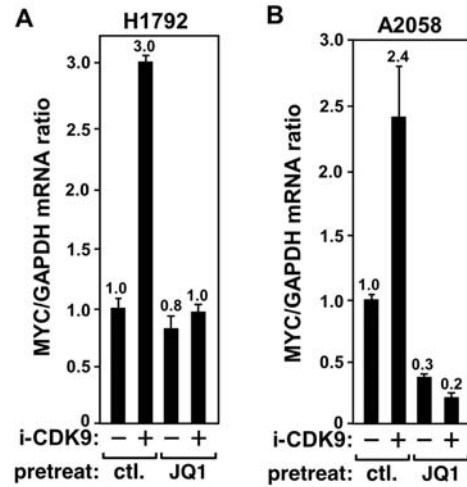

**Figure 4-figure supplement 3.**

**JQ1 blocks the i-CDK9-induced MYC expression in H1792 and A2058 cells. A. & B.** H1792 (A) and A2058 cells (B) were pretreated with JQ1 or the control enantiomer (ctl.) and then incubated with (+) or without (-) i-CDK9 for 8 hr. Total RNAs were extracted and analyzed by qRT-PCR to obtain the ratios of MYC versus GAPDH mRNA levels. The MYC/GAPDH ratio in cells exposed to neither JQ1 nor i-CDK9 is artificially set to 1.0.
