# Supplementary material for: Compensatory induction of MYC expression by sustained CDK9 inhibition via a BRD4-dependent mechanism
Source: eLife journal article supplement (doi:10.7554/elife.06535), 2015-06-17
Supplement: supp [file elife_poa_e06535_Figure_4_figure_supplement_4.docx]

**Fig.4-figure supplement 4.**

**MYC induction by 0.3 μM i-CDK9 can be subsequently shut off by 2 μM of the drug.** HeLa cells were incubated sequentially with the indicated concentrations of i-CDK9 for the duration as marked on the top left. Whole cell lysates were analyzed by SDS-PAGE followed by Western blotting to monitor the levels of MYC and α-Tubulin.
