# Supplementary material for: Compensatory induction of MYC expression by sustained CDK9 inhibition via a BRD4-dependent mechanism
Source: eLife journal article supplement (doi:10.7554/elife.06535), 2015-06-17
Supplement: supp [file elife_poa_e06535_Figure_4_figure_supplement_5.docx]

**
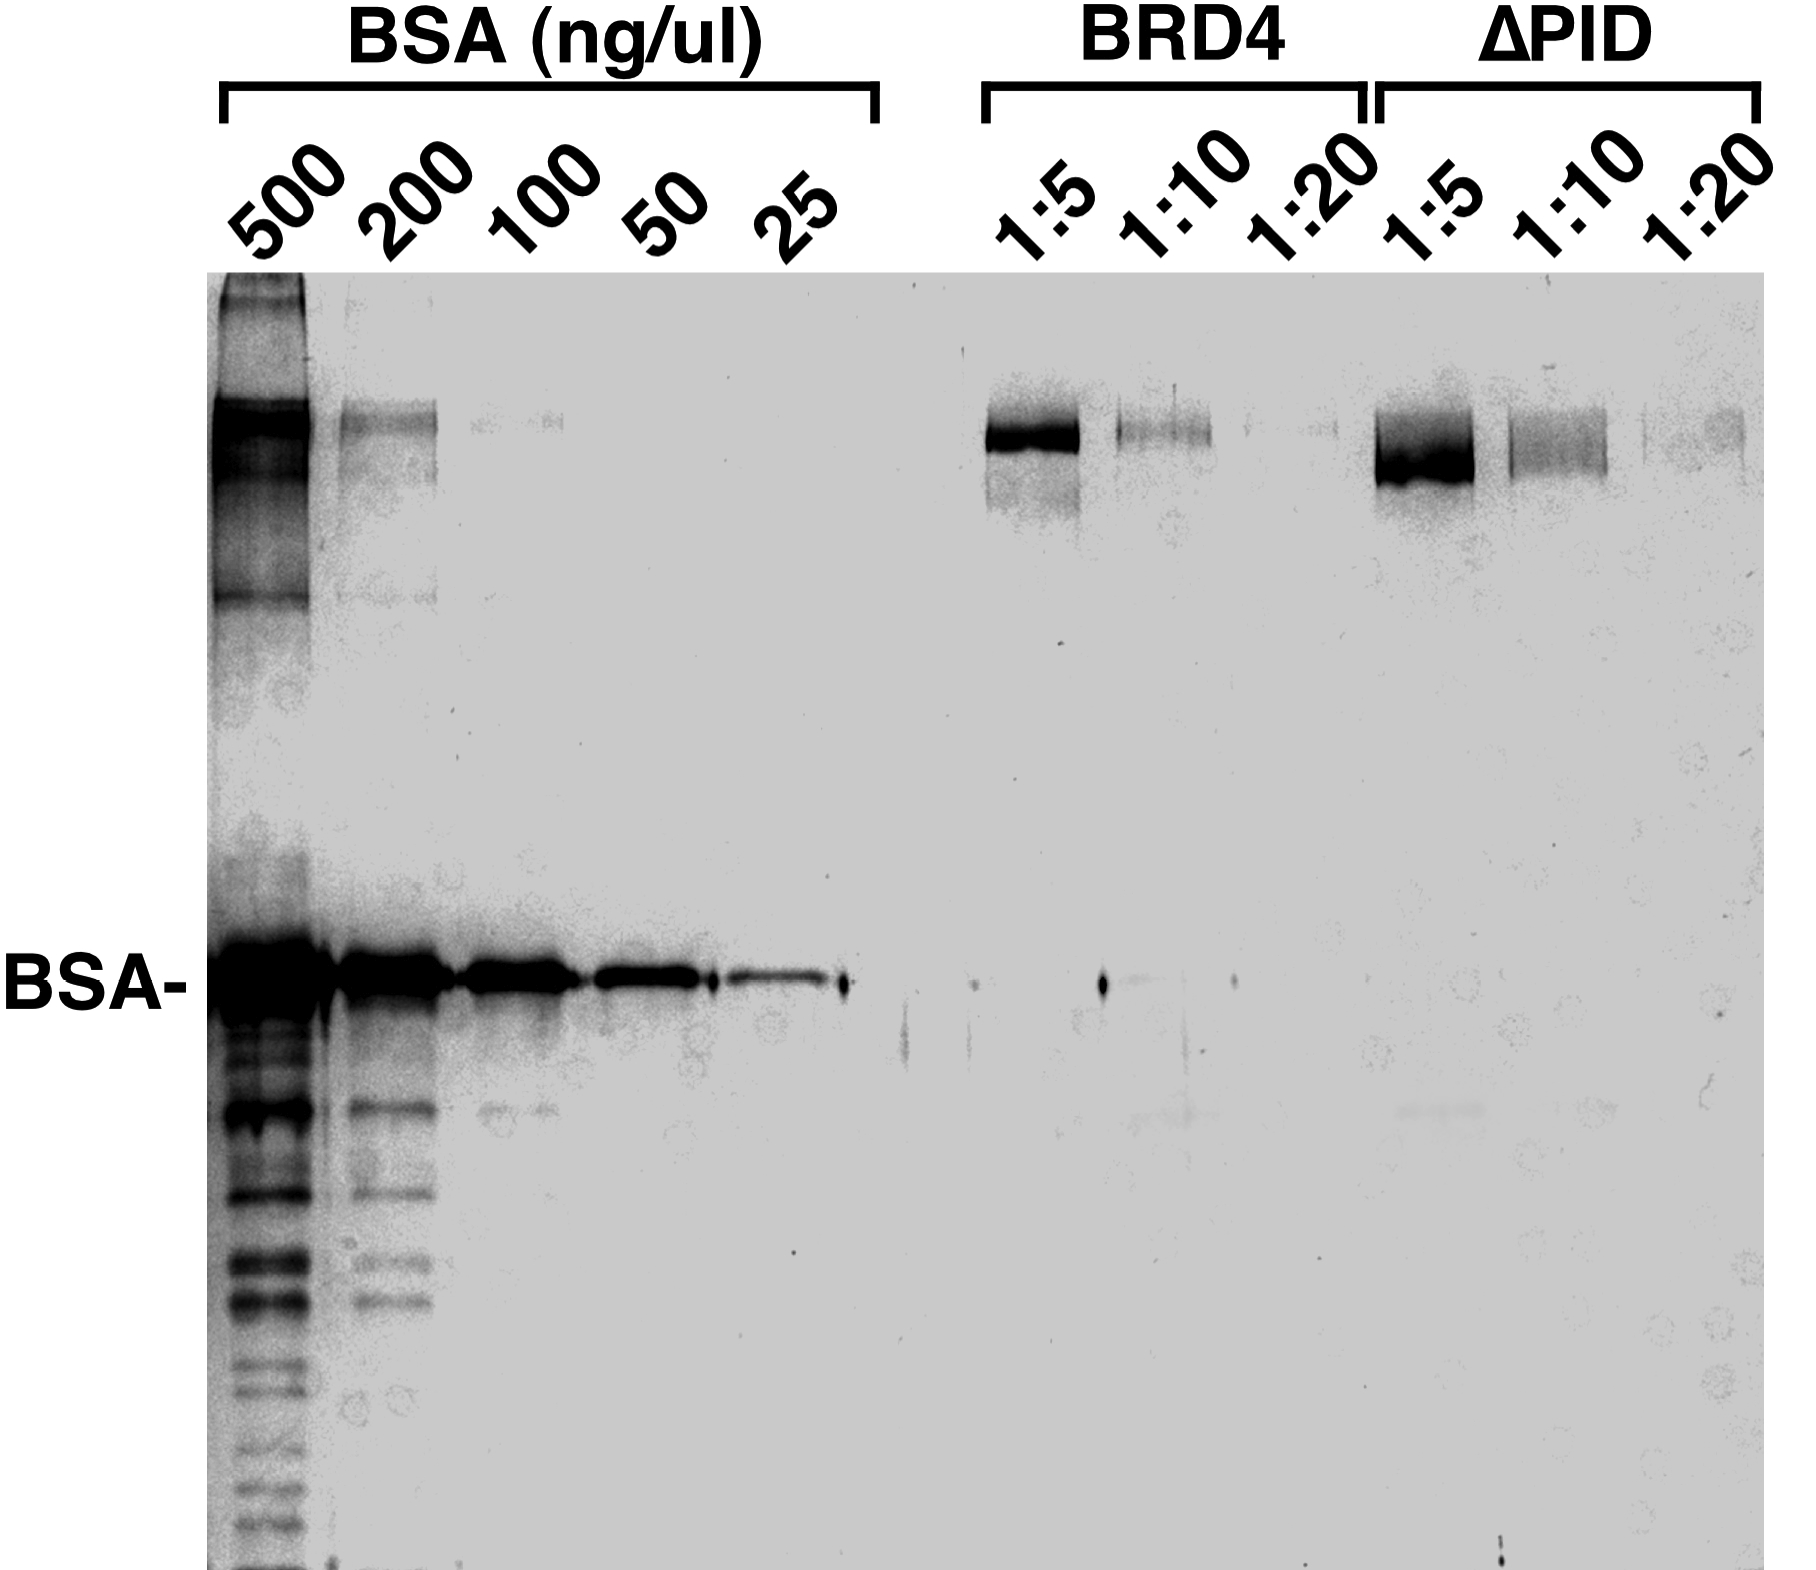
**

**Figure 4-figure supplement 5.**

**Examination of the purity and concentrations of WT and ∆PID BRD4 used in the CDK9 kinase assay.** The Flag-tagged WT and ∆PID BRD4 were affinity-purified from nuclear extracts of transfected HEK293 cells under high-salt/detergent conditions (1.0 M KCl + 1% NP-40) to strip away any associated factors and then examined for their purity and concentrations by comparing to known amounts of BSA in a silver stained SDS gel.
